# Supplementary material for: Digital Practices by Citizens During the COVID-19 Pandemic: Findings From an International Multisite Study
Source: PubMed Central journal article supplement (PMC9994468; doi:10.2196/41304), 2023-03-06
Supplement: mental_v10i1e41304_app1.pdf [file mental_v10i1e41304_app1.pdf]

**COVID-19: Technology, Social Connections, Loneliness & Leisure Activities: Wave 1 (online survey)**

| <b>Question #</b> | <b>Item</b>                                                       | <b>Answer (options)</b>                                                                                                                                                                                                                                                                                                                                                                                                                                                                                                                                                                                          | <b>Additional information</b> |
|-------------------|-------------------------------------------------------------------|------------------------------------------------------------------------------------------------------------------------------------------------------------------------------------------------------------------------------------------------------------------------------------------------------------------------------------------------------------------------------------------------------------------------------------------------------------------------------------------------------------------------------------------------------------------------------------------------------------------|-------------------------------|
| 2                 | Do you own a computer                                             | Yes<br>No                                                                                                                                                                                                                                                                                                                                                                                                                                                                                                                                                                                                        |                               |
| 3                 | How long have you used a computer?                                | More than 15 years<br>More than 10 years<br>More than 5 years<br>For 1 year or less<br>Less than 1 year                                                                                                                                                                                                                                                                                                                                                                                                                                                                                                          |                               |
| 4                 | What do you use a computer for?<br>Select all that apply          | Connecting with COVID-19-support group(s)<br>Connecting with Community Groups<br>Ordering fruit/veg boxes from a local supplier.<br>Connecting with friends<br>Connecting with family<br>Ordering from a local bakery<br>Connecting with healthcare professionals<br>Writing a COVID-19 blog<br>Watching porn<br>Word processing<br>Email<br>Playing games<br>Online banking<br>Job searching<br>Accessing social media<br>Online shopping<br>For work purposes<br>For tracking/recording my data (finances/health etc.)<br>Listening to music<br>Watching TV<br>Searching the Internet<br>Paying bills<br>Other |                               |
| 5                 | In a week, how frequently do you use a computer?                  | Daily<br>2-3 times a week<br>Once a week<br>Never                                                                                                                                                                                                                                                                                                                                                                                                                                                                                                                                                                |                               |
| 6                 | Do you have the Internet at home?                                 | Yes<br>No                                                                                                                                                                                                                                                                                                                                                                                                                                                                                                                                                                                                        |                               |
| 7                 | How do you usually access the Internet?<br>Select all that apply. | via a Smartphone<br>via a PC/Laptop<br>via a Tablet<br>via the TV<br>via multiple devices                                                                                                                                                                                                                                                                                                                                                                                                                                                                                                                        |                               |
| 8                 | How frequently do you use the Internet?                           | More than once a day<br>About once a day<br>More than once a week<br>Every other day<br>More than once a month                                                                                                                                                                                                                                                                                                                                                                                                                                                                                                   |                               |

|    |                                                                                                                                                                                             |                                                                                                                                                                                                                                                                                                                                                                                                                                                                                                                                                                                                                                                                                                                                                                                          |  |
|----|---------------------------------------------------------------------------------------------------------------------------------------------------------------------------------------------|------------------------------------------------------------------------------------------------------------------------------------------------------------------------------------------------------------------------------------------------------------------------------------------------------------------------------------------------------------------------------------------------------------------------------------------------------------------------------------------------------------------------------------------------------------------------------------------------------------------------------------------------------------------------------------------------------------------------------------------------------------------------------------------|--|
| 9  | <p>What do you use the Internet for? Select all that apply.</p>                                                                                                                             | <p>Job searching<br/>         Searching for Health Information<br/>         Using Facebook<br/>         Using Twitter<br/>         Streaming Netflix<br/>         Streaming BBC iPlayer<br/>         Streaming other<br/>         Downloading activity<br/>         Playing games<br/>         Listening to music<br/>         Watching porn<br/>         Reading<br/>         I use the Internet for work<br/>         Online Banking<br/>         Emailing<br/>         Online Shopping<br/>         Searching for Information (e.g., weather, fact checking etc.)<br/>         Dating sites/apps<br/>         Booking travel arrangements<br/>         Booking holidays<br/>         Booking events (e.g., music events)<br/>         Accessing gambling sites<br/>         Other</p> |  |
| 10 | <p>Do you use social networking sites (e.g. Facebook, Twitter, Snapchat, Instagram, Pinterest, LinkedIn)</p>                                                                                | <p>Yes<br/>         No</p>                                                                                                                                                                                                                                                                                                                                                                                                                                                                                                                                                                                                                                                                                                                                                               |  |
| 11 | <p>Which social media &amp; communication platforms do you use? Select all that apply.<br/>         Which social media &amp; communication platforms do you use? Select all that apply.</p> | <p>Facebook<br/>         Twitter<br/>         Instagram<br/>         Snapchat<br/>         LinkedIn<br/>         What's App<br/>         Viber<br/>         Facebook Messenger<br/>         FaceTime<br/>         Pinterest<br/>         Skype (incl. Business)<br/>         Zoom<br/>         Telegram<br/>         WeChat<br/>         Other</p>                                                                                                                                                                                                                                                                                                                                                                                                                                       |  |
| 12 | <p>How long have you been using social</p>                                                                                                                                                  | <p>10-15 years<br/>         5-10 years<br/>         Less than 5 years</p>                                                                                                                                                                                                                                                                                                                                                                                                                                                                                                                                                                                                                                                                                                                |  |

|    |                                                                                                                   |                                                                                                                                                                                                                                                                                                                                                                                                                                                                                                                                                                                                                                                                                 |  |
|----|-------------------------------------------------------------------------------------------------------------------|---------------------------------------------------------------------------------------------------------------------------------------------------------------------------------------------------------------------------------------------------------------------------------------------------------------------------------------------------------------------------------------------------------------------------------------------------------------------------------------------------------------------------------------------------------------------------------------------------------------------------------------------------------------------------------|--|
|    | networking sites (Facebook, Twitter, Instagram, Pinterest, LinkedIn)?                                             | Less than 1 year                                                                                                                                                                                                                                                                                                                                                                                                                                                                                                                                                                                                                                                                |  |
| 13 | How frequently do you use social networking sites?                                                                | Daily<br>4-6 times a week<br>2-3 times a week<br>Once a week<br>Never                                                                                                                                                                                                                                                                                                                                                                                                                                                                                                                                                                                                           |  |
| 14 | Which social media platform do you use the most?                                                                  | Open ended answer                                                                                                                                                                                                                                                                                                                                                                                                                                                                                                                                                                                                                                                               |  |
| 15 | Which communication platforms do you use the most? Select all that apply.                                         | What's App<br>Facebook messenger<br>Telegram<br>Viber<br>SMS<br>Telephone call<br>Snapchat<br>Facetime<br>Zoom<br>Other                                                                                                                                                                                                                                                                                                                                                                                                                                                                                                                                                         |  |
| 16 | Why do you use social media sites? Select all that apply.                                                         | To share Information<br>To stay connected to friends<br>To stay connected with family<br>To share photographs<br>To organise events<br>To take part/follow events & groups that I am interested in<br>To keep up to date with the latest news<br>To express my opinions and views<br>To keep up to date with COVID-19 information<br>To share information about COVID-19<br>To search for local delivery companies (e.g., fruit & veg) during COVID-19<br>To keep up to date with support groups during COVID-19<br>To contact my neighbours/community for help/assistance during COVID-19<br>To contact/receive support from healthcare professionals during COVID-19<br>Other |  |
| 17 | Since COVID-19 have you become a member of a community support group on social media (e.g., Facebook or similar)? | Yes<br>No                                                                                                                                                                                                                                                                                                                                                                                                                                                                                                                                                                                                                                                                       |  |

|    |                                                                                                                                                                       |                     |  |
|----|-----------------------------------------------------------------------------------------------------------------------------------------------------------------------|---------------------|--|
| 18 | Since COVID-19 are you familiar with any community support groups on social media (e.g., Facebook or similar) platforms?                                              | Yes<br>Unsure<br>No |  |
| 19 | Since COVID-19 have you had to request assistance from a loved one or the community for support (e.g., delivering groceries, prescriptions etc.)?                     | Yes<br>No           |  |
| 20 | Since COVID-19 have you signed up to receive community deliveries/assistance (e.g., groceries from a local newsagents /community shop / butcher's / farmer's market)? | Yes<br>No           |  |
| 21 | Since COVID-19 would you sign up to receive community deliveries/assistance (e.g., groceries from a local newsagents/community shop/ butcher's / farmer's market)?    | Yes<br>Unsure<br>No |  |
| 22 | Please describe why you <b>WOULD</b> sign up to receive community deliveries and/or assistance. If you choose not to                                                  | Open ended answer   |  |

|    |                                                                                                                                                                    |                                                                                                                                                                                                                                                                                                                                                                                                                                                                                                                                                                                                                                                                                                                                                                                                                                                                                                                                                                                                                                                         |                                                                                                                                |
|----|--------------------------------------------------------------------------------------------------------------------------------------------------------------------|---------------------------------------------------------------------------------------------------------------------------------------------------------------------------------------------------------------------------------------------------------------------------------------------------------------------------------------------------------------------------------------------------------------------------------------------------------------------------------------------------------------------------------------------------------------------------------------------------------------------------------------------------------------------------------------------------------------------------------------------------------------------------------------------------------------------------------------------------------------------------------------------------------------------------------------------------------------------------------------------------------------------------------------------------------|--------------------------------------------------------------------------------------------------------------------------------|
|    | answer please write N/A                                                                                                                                            |                                                                                                                                                                                                                                                                                                                                                                                                                                                                                                                                                                                                                                                                                                                                                                                                                                                                                                                                                                                                                                                         |                                                                                                                                |
| 23 | Please describe why you are unsure or you <b>WOULD NOT</b> sign up to receive community deliveries and/or assistance. If you choose not to answer please write N/A | Open ended answer                                                                                                                                                                                                                                                                                                                                                                                                                                                                                                                                                                                                                                                                                                                                                                                                                                                                                                                                                                                                                                       |                                                                                                                                |
| 24 | Since COVID-19 how have you been spending your time? Select all that apply                                                                                         | <ul style="list-style-type: none"> <li>• I am a key worker.</li> <li>• Home schooling my children</li> <li>• Communicating with specific COVID-19 support group(s) for my area.</li> <li>• Sleeping</li> <li>• Attending virtual exercise sessions (e.g., Yoga/Pilates/ Joe Wicks)</li> <li>• Attending virtual community meetings (e.g., WI, Men's Sheds or similar)</li> <li>• Attending virtual educational classes</li> <li>• Attending work-related meetings on communication tools</li> <li>• Working from home</li> <li>• Self-isolating due to vulnerable loved ones</li> <li>• Catching up reading books</li> <li>• Watching streaming services</li> <li>• Sharing information on social media sites</li> <li>• Gardening/allotment</li> <li>• Searching for activities for my child/children</li> <li>• Connecting with friends/family virtually</li> <li>• Online grocery shopping</li> <li>• Virtually connecting with community support groups</li> <li>• I am not complying (please describe your activities)</li> <li>• Other</li> </ul> |                                                                                                                                |
| 25 | Since COVID-19, please rate your level of concerns (relating to yourself) about the various challenges faced in society                                            | <ul style="list-style-type: none"> <li>• My death &amp; that of people close to me (e.g., family members)</li> <li>• Limited physical contact with loved ones</li> <li>• Limited social contact with friends and family</li> <li>• Food shortage</li> <li>• Being able to pay bills (incl. rent/mortgage)</li> <li>• My mental health</li> <li>• The mental health of my children &amp; family members</li> <li>• Not having a job to go back to Eating healthy because of food allergies, and overall health.</li> <li>• I am on my own. I have no support (e.g., no children etc.)</li> </ul>                                                                                                                                                                                                                                                                                                                                                                                                                                                         | 5-pt Likert [Strongly disagree – Strongly agree] User engages/answers via a slider [strongly disagree 0-100 strongly disagree] |

|    |                                                                                                                    |                                                                                                                                                                                                                                                                                                                                                                                                                                                                                                                                             |  |
|----|--------------------------------------------------------------------------------------------------------------------|---------------------------------------------------------------------------------------------------------------------------------------------------------------------------------------------------------------------------------------------------------------------------------------------------------------------------------------------------------------------------------------------------------------------------------------------------------------------------------------------------------------------------------------------|--|
|    |                                                                                                                    | <ul style="list-style-type: none"> <li>• Businesses going bust.</li> <li>• Entering a recession</li> <li>• Not completing my education (e.g., college/university)</li> <li>• Education for my child/children</li> <li>• Staying alive (due to pre-existing health conditions)</li> </ul>                                                                                                                                                                                                                                                    |  |
| 26 | What type of digital devices do you own in your home? Select all that apply                                        | Smart phone<br>Mobile phone<br>Tablet<br>Desktop PC/Laptop                                                                                                                                                                                                                                                                                                                                                                                                                                                                                  |  |
| 27 | Which digital device do you use most frequently?<br>(Select 1 answer)                                              | Smart phone<br>Mobile phone<br>Tablet<br>Desktop PC/Laptop                                                                                                                                                                                                                                                                                                                                                                                                                                                                                  |  |
| 28 | On your digital device do you share information about COVID-19?                                                    | Yes<br>Sometimes<br>No                                                                                                                                                                                                                                                                                                                                                                                                                                                                                                                      |  |
| 29 | How frequently do you share information?                                                                           | Daily<br>4-6 times a week<br>2-3 times a week<br>Once a week<br>Never                                                                                                                                                                                                                                                                                                                                                                                                                                                                       |  |
| 30 | Why do you share information surrounding COVID-19?<br>Select all that apply                                        | <ul style="list-style-type: none"> <li>• Because I want to update my friends and family</li> <li>• Because it is important to share information during this pandemic</li> <li>• Because it is my responsibility as a citizen to share information to help other citizens?</li> <li>• Because I like to share information</li> <li>• To express my views and opinions</li> <li>• To stay connected with friends.</li> <li>• To stay connected with grand/children.</li> <li>• To stay connected with the Community support groups</li> </ul> |  |
| 31 | Do you have any concerns about sharing information surrounding COVID-19?                                           | Yes<br>Maybe<br>No                                                                                                                                                                                                                                                                                                                                                                                                                                                                                                                          |  |
| 32 | You answered YES/MAYBE to the previous question. Please describe why. If you choose not to answer please write N/A | Open ended answer                                                                                                                                                                                                                                                                                                                                                                                                                                                                                                                           |  |

|    |                                                                                                                                         |                                                                                                                                                                                                                                                                                                                                                                                                                                                                                                                                                                                                                                     |                                                   |
|----|-----------------------------------------------------------------------------------------------------------------------------------------|-------------------------------------------------------------------------------------------------------------------------------------------------------------------------------------------------------------------------------------------------------------------------------------------------------------------------------------------------------------------------------------------------------------------------------------------------------------------------------------------------------------------------------------------------------------------------------------------------------------------------------------|---------------------------------------------------|
| 33 | You answered NO to the previous question. Please describe why. If you choose not to answer please write N/A                             | Open ended answer                                                                                                                                                                                                                                                                                                                                                                                                                                                                                                                                                                                                                   |                                                   |
| 34 | Have you changed your use & behaviour of technology during COVID-19 crisis?                                                             | Yes<br>A little<br>No                                                                                                                                                                                                                                                                                                                                                                                                                                                                                                                                                                                                               |                                                   |
| 35 | How has your use & behaviour of Technology changed during COVID-19? Please describe below. If you choose not to answer please write N/A | Open ended answer                                                                                                                                                                                                                                                                                                                                                                                                                                                                                                                                                                                                                   |                                                   |
| 36 | During COVID-19 new experiences are happening. Please select which best suits you                                                       | <ul style="list-style-type: none"> <li>• Making new social connections/friendships</li> <li>• Sharing my knowledge &amp; skills with the community</li> <li>• Learning new information</li> <li>• Learning new skills</li> <li>• Spending more time with spouse/family members</li> <li>• Changing my routine</li> <li>• Sharing information across the community to help those who could be vulnerable.</li> <li>• Being a key worker &amp; helping in this pandemic</li> <li>• Home schooling my children</li> <li>• Being able to cook for my family.</li> <li>• Being isolated more</li> <li>• Giving something back</li> </ul> | 7-pt Likert<br>[Strongly Agree-Strongly Disagree] |
| 37 | During COVID-19, have you volunteered to help your community?                                                                           | Yes<br>No<br>Not, but I would like to                                                                                                                                                                                                                                                                                                                                                                                                                                                                                                                                                                                               |                                                   |
| 38 | Please describe how you are volunteering or would like to get involved? If you choose not to                                            | Open ended answer                                                                                                                                                                                                                                                                                                                                                                                                                                                                                                                                                                                                                   |                                                   |

|    |                                                                                                                               |                                                                                                                                                                                                                                                                                                                                                                                                                                                                                                                                                                                                                                                                                                                                                                                                                                                                                                                                                                                                                                                                                                                                                                                                                                                                                                                                                                                                                   |                                                |
|----|-------------------------------------------------------------------------------------------------------------------------------|-------------------------------------------------------------------------------------------------------------------------------------------------------------------------------------------------------------------------------------------------------------------------------------------------------------------------------------------------------------------------------------------------------------------------------------------------------------------------------------------------------------------------------------------------------------------------------------------------------------------------------------------------------------------------------------------------------------------------------------------------------------------------------------------------------------------------------------------------------------------------------------------------------------------------------------------------------------------------------------------------------------------------------------------------------------------------------------------------------------------------------------------------------------------------------------------------------------------------------------------------------------------------------------------------------------------------------------------------------------------------------------------------------------------|------------------------------------------------|
|    | answer please write N/A                                                                                                       |                                                                                                                                                                                                                                                                                                                                                                                                                                                                                                                                                                                                                                                                                                                                                                                                                                                                                                                                                                                                                                                                                                                                                                                                                                                                                                                                                                                                                   |                                                |
| 39 | Since COVID-19, has the way you use your digital devices changed your way of communication?                                   | Yes<br>A little<br>No                                                                                                                                                                                                                                                                                                                                                                                                                                                                                                                                                                                                                                                                                                                                                                                                                                                                                                                                                                                                                                                                                                                                                                                                                                                                                                                                                                                             |                                                |
| 40 | Please describe how your communication behaviour(s) has changed since COVID-19. If you choose not to answer please write N/A. | Open ended answer                                                                                                                                                                                                                                                                                                                                                                                                                                                                                                                                                                                                                                                                                                                                                                                                                                                                                                                                                                                                                                                                                                                                                                                                                                                                                                                                                                                                 |                                                |
| 41 | Select one response against each statement to indicate how much you agree or disagree                                         | <ul style="list-style-type: none"> <li>• “I like most parts of my personality.”</li> <li>• “When I look at the story of my life, I am pleased with how things have turned out so far”</li> <li>• “Some people wander aimlessly through life, but I am not one of them.”</li> <li>• “The demands of everyday life often get me down.”</li> <li>• “In many ways I feel disappointed about my achievements in life.”</li> <li>• “Maintaining close relationships has been difficult and frustrating for me.”</li> <li>• “I live life one day at a time and don't really think about the future.”</li> <li>• “In general, I feel I am in charge of the situation in which I live.”</li> <li>• “I am good at managing the responsibilities of daily life.”</li> <li>• “I sometimes feel as if I've done all there is to do in life.”</li> <li>• “For me, life has been a continuous process of learning, changing, and growth.”</li> <li>• “I think it is important to have new experiences that challenge how I think about myself and the world.”</li> <li>• “People would describe me as a giving person, willing to share my time with others.”</li> <li>• “I gave up trying to make big improvements or changes in my life a long time ago.”</li> <li>• “I tend to be influenced by people with strong opinions”</li> <li>• “I have not experienced many warm and trusting relationships with others.”</li> </ul> | 7-pt Likert [Strongly Agree-Strongly Disagree] |



|    |                                                                                       |                                                                                                                                                                                                                                                                                                                                                                                                                                                                                                                                                                                                                                                                                                                                                                                                                                                                                                                                                                                                                                                                                                                                                                                                                                                      |                                                   |
|----|---------------------------------------------------------------------------------------|------------------------------------------------------------------------------------------------------------------------------------------------------------------------------------------------------------------------------------------------------------------------------------------------------------------------------------------------------------------------------------------------------------------------------------------------------------------------------------------------------------------------------------------------------------------------------------------------------------------------------------------------------------------------------------------------------------------------------------------------------------------------------------------------------------------------------------------------------------------------------------------------------------------------------------------------------------------------------------------------------------------------------------------------------------------------------------------------------------------------------------------------------------------------------------------------------------------------------------------------------|---------------------------------------------------|
|    |                                                                                       | <ul style="list-style-type: none"> <li>• “I have confidence in my own opinions, even if they are different from the way most other people think.”</li> <li>• “I judge myself by what I think is important, not by the values of what others think is important.”</li> </ul>                                                                                                                                                                                                                                                                                                                                                                                                                                                                                                                                                                                                                                                                                                                                                                                                                                                                                                                                                                          |                                                   |
| 42 | Select one response against each statement to indicate how much you agree or disagree | <ul style="list-style-type: none"> <li>• I know how to find helpful health resources on the Internet.</li> <li>• I know how to use the Internet to answer my health questions.</li> <li>• I know what health resources are available on the Internet.</li> <li>• I know where to find helpful health resources on the Internet.</li> <li>• I know how to use the health information I find on the Internet to help me.</li> <li>• I have the skills I need to evaluate the health resources I find on the Internet.</li> <li>• I can tell high quality from low quality health resources on the Internet.</li> <li>• I feel confident in using information from the Internet to make health decisions.</li> </ul>                                                                                                                                                                                                                                                                                                                                                                                                                                                                                                                                    | 5-pt Likert<br>[Strongly agree-Strongly disagree] |
| 43 | Select one response against each statement to indicate how your feelings              | <ul style="list-style-type: none"> <li>• How often do you feel that you are "in tune" with the people around you?</li> <li>• How often do you feel that you lack companionship?</li> <li>• How often do you feel that there is no one you can turn to?</li> <li>• How often do you feel alone?</li> <li>• How often do you feel part of the a group of friends?</li> <li>• How often do you feel that you have a lot in common with the people around you?</li> <li>• How often do you feel that you are no longer close to anyone?</li> <li>• How often do you feel that your interests &amp; ideas are not shared by those around you?</li> <li>• How often do you feel outgoing &amp; friendly?</li> <li>• How often do you feel close to people?</li> <li>• How often do you feel left out?</li> <li>• How often do you feel that your relationships with other are not meaningful?</li> <li>• How often do you feel that no one really knows you well?</li> <li>• How often do you feel that there are people who really understand you?</li> <li>• How often do you feel shy?</li> <li>• How often do you feel that people are around you but not with you?</li> <li>• How often do you feel that there are people you can talk to?</li> </ul> | 4-pt Likert<br>[Never-Often]                      |

|    |                                                                                                                                                               |                                                                                                                                                                                                                                                 |                                                                      |
|----|---------------------------------------------------------------------------------------------------------------------------------------------------------------|-------------------------------------------------------------------------------------------------------------------------------------------------------------------------------------------------------------------------------------------------|----------------------------------------------------------------------|
|    |                                                                                                                                                               | <ul style="list-style-type: none"> <li>• How often do you feel that are people you can turn to?</li> <li>• How often do you feel isolated from others?</li> <li>• How often do you feel you can find companionship when you want it?</li> </ul> |                                                                      |
| 44 | Since COVID-19, has your communication changed within your social networks?                                                                                   | Yes<br>A little<br>No                                                                                                                                                                                                                           |                                                                      |
| 45 | During the COVID-19 Pandemic how frequently have you communicated with members of your social network? Please rate your answers below on each of the sliders  | Friends<br>Work colleagues<br>Members from a community group (e.g., Women's Institute, Church, Men's Sheds etc.)<br>COVID-19 Community Support Group<br>Family members<br>Children<br>Grandchildren                                             | User engages/answers via a slider [Not at all 0-100 Very Frequently] |
| 46 | Does your country have a National Emergency Alert System (e.g., mobile app or SMS)?                                                                           | Yes<br>Unsure<br>No                                                                                                                                                                                                                             |                                                                      |
| 47 | Please describe what your thoughts are relating to a National Emergency Alert System (e.g., mobile app or SMS)? If you choose not to answer please write N/A. | Open ended answer                                                                                                                                                                                                                               |                                                                      |
| 48 | Virtual Assistants such as Alexa, Google Home, Siri have various features. Please describe whether you think such devices or similar would be suitable        | Open ended answer                                                                                                                                                                                                                               |                                                                      |

|    |                                                                                                                                                                                     |                                                                                                                                                                                                                                                                                                                                                                                                                                                                                      |  |
|----|-------------------------------------------------------------------------------------------------------------------------------------------------------------------------------------|--------------------------------------------------------------------------------------------------------------------------------------------------------------------------------------------------------------------------------------------------------------------------------------------------------------------------------------------------------------------------------------------------------------------------------------------------------------------------------------|--|
|    | as a way of sharing National Emergency Alert Systems. If you choose not to answer, please write N/A                                                                                 |                                                                                                                                                                                                                                                                                                                                                                                                                                                                                      |  |
| 49 | Please add any additional information that you would like to share about your experiences & day-to-day living during COVID-19 crisis. If you choose not to answer, please write N/A | Open ended answer                                                                                                                                                                                                                                                                                                                                                                                                                                                                    |  |
| 50 | What type of community do you live in?                                                                                                                                              |                                                                                                                                                                                                                                                                                                                                                                                                                                                                                      |  |
| 51 | What is your age?                                                                                                                                                                   | 18-95+ years<br>Split up into interval categories (e.g., 18-24, 25-29)                                                                                                                                                                                                                                                                                                                                                                                                               |  |
| 52 | What is your highest level of education? - please select ONE answer                                                                                                                 | Less than high school degree<br>High school (E.g., O Levels, GED, GCSE)<br>Some college but no degree (E.g., BTEC, NVQ, A-Levels)<br>Bachelor's degree (3-year)<br>Master's degree<br>Doctoral degree<br>Professional degree (JD, MD)<br>Other                                                                                                                                                                                                                                       |  |
| 53 | Which best describes your ethnicity?                                                                                                                                                | White (Caucasian, European, Irish)<br>Any other White background<br>Irish Traveller<br>Black or African American /British<br>Caribbean<br>Native American/ American Indian / Alaska Native<br>Pacific Islander/ Native Hawaiian<br>Hispanic/Latino (Mexican, Puerto Rican Cuban)<br>Asian British or Asian American (Indian, Bangladeshi, Pakistani, Sikh)<br>Chinese/Filipino, Vietnamese/Thai British or American<br>Chinese/Filipino, Vietnamese/Thai<br>Other Asian origin group |  |
| 54 | How would you describe your gender?                                                                                                                                                 | Male (identify as male)<br>Female (identify as female)<br>Prefer to self describe as (non-binary, gender fluid, agender, please specify)<br>Prefer not to say                                                                                                                                                                                                                                                                                                                        |  |
| 55 | Do you identify as transgender or                                                                                                                                                   | Yes<br>No                                                                                                                                                                                                                                                                                                                                                                                                                                                                            |  |

|    |                                                                                                            |                                                                                                                                                                                                                                                              |  |
|----|------------------------------------------------------------------------------------------------------------|--------------------------------------------------------------------------------------------------------------------------------------------------------------------------------------------------------------------------------------------------------------|--|
|    | have a transgender history?                                                                                | Prefer not to say                                                                                                                                                                                                                                            |  |
| 56 | Please select the sexual orientation category that best represents you:                                    | Heterosexual (straight)<br>Gay man<br>Gay Woman / Lesbian<br>Bisexual<br>Pansexual<br>Prefer not to say<br>Prefer to self-describe                                                                                                                           |  |
| 57 | Marital Status                                                                                             | Single<br>Married<br>Widowed<br>Divorced<br>Separated<br>Civil Partnership<br>Prefer not to say                                                                                                                                                              |  |
| 58 | How many people (including yourself) are living or staying at your address? (please select 1 answer)       | 1<br>2<br>3<br>4<br>5<br>6<br>More than 6                                                                                                                                                                                                                    |  |
| 59 | How many people include children (under 18 years old) are living at your address? (please select 1 answer) | 0<br>1<br>2<br>3<br>4<br>5<br>6<br>More than 6                                                                                                                                                                                                               |  |
| 60 | Do you meet the criteria for being vulnerable or extremely vulnerable?                                     | Yes<br>No                                                                                                                                                                                                                                                    |  |
| 61 | Which statement best describes your current employment status?                                             | Working (paid employee)<br>Working (self-employed)<br>Not working (furlough because of COVID-19)<br>Not working (looking for work)<br>Not working (retired)<br>Not working (disabled)<br>Not working (other)                                                 |  |
| 62 | Which of the following industries most closely matches your employment/                                    | Education (e.g., Academic/Researcher/Doctoral Student)<br>Entertainment/Tech Industry<br>Self-employed<br>I am a student (e.g., part time, full time)<br>Forestry, fishing, hunting or agriculture support<br>Real estate or rental and leasing<br>Homemaker |  |

|    |                                                   |                                                                                                                                                                                                                                                                                                                                                                                                                                                                                            |  |
|----|---------------------------------------------------|--------------------------------------------------------------------------------------------------------------------------------------------------------------------------------------------------------------------------------------------------------------------------------------------------------------------------------------------------------------------------------------------------------------------------------------------------------------------------------------------|--|
|    | past employment?                                  | Professional, scientific or technical services<br>Utilities<br>Management of companies or enterprises<br>Admin, support, waste management or remediation services<br>Manufacturing<br>Educational services<br>Wholesale trade<br>Health care or social assistance<br>Retail trade<br>Arts, entertainment or recreation<br>Transportation or warehousing<br>Accommodation or food services<br>Information<br>Other services (except public administration)<br>Finance or insurance<br>Other |  |
| 63 | Do you consider yourself to have a disability?    | Yes<br>No<br>Prefer not to say                                                                                                                                                                                                                                                                                                                                                                                                                                                             |  |
| 64 | In which country do you currently reside?         | Drop down menu for selection                                                                                                                                                                                                                                                                                                                                                                                                                                                               |  |
| 65 | Have you had to self-isolate because of COVID-19? | Yes<br>No                                                                                                                                                                                                                                                                                                                                                                                                                                                                                  |  |
